# Supplementary material
Source: PubMed Central journal article supplement (PMC3280884)
Supplement: NIHMS348938-supplement-Supplementary_Data.pdf [file NIHMS348938-supplement-Supplementary_Data.pdf]

## Supplemental Figure 1

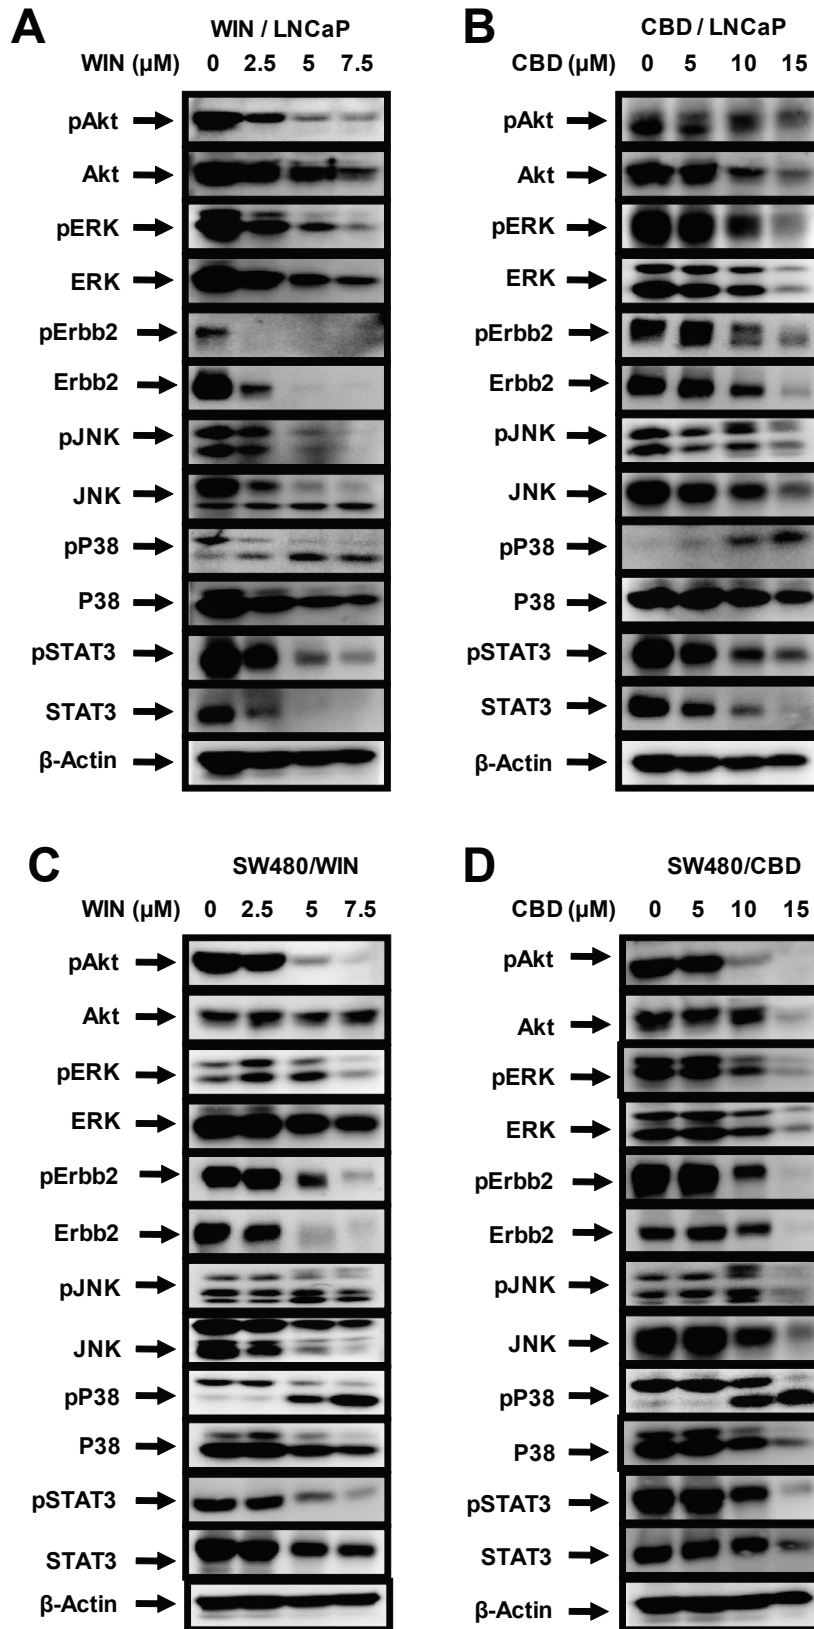

**Figure S1.** Effects of WIN and CBD on phospho and total kinase proteins in LNCaP (A, B) and SW480 (C, D) cells. Cells were treated with varying concentrations of WIN (2.5, 5 or 7.5  $\mu\text{M}$ ) and CBD (5, 10 or 15  $\mu\text{M}$ ) for 48 and 24 hr, respectively, and whole cell lysates were analyzed by western blot analysis as described in Materials and Methods.  $\beta$ -Actin served as a loading control for all western blots.
